# Supplementary material
Source: Springer Nature journal article supplement (https://www.springermedizin.de/resource/supplementary/13058_2010_9529_MOESM9_ESM.pdf/9702366)

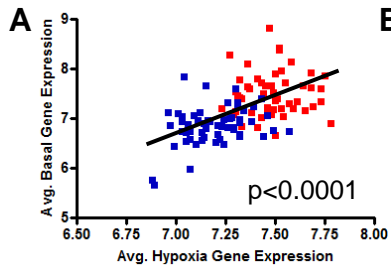

Subgroup 7/10 Tumors

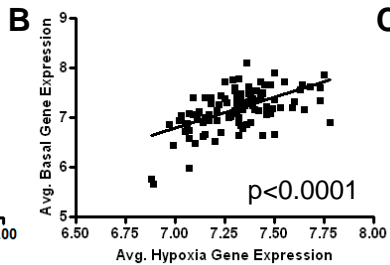

ERBB2+ Tumors

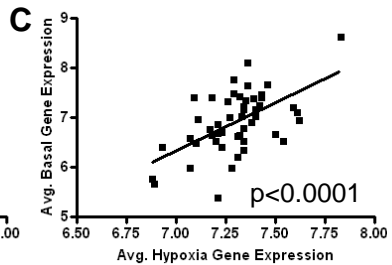

HER2+ IHC Tumors

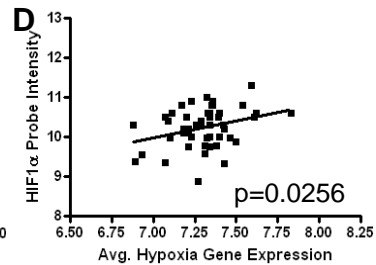

HER2+ IHC Tumors

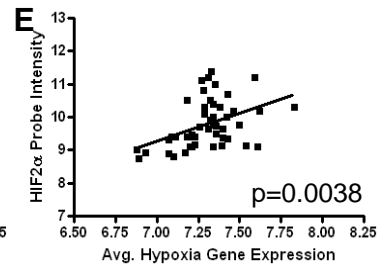

HER2+ IHC Tumors

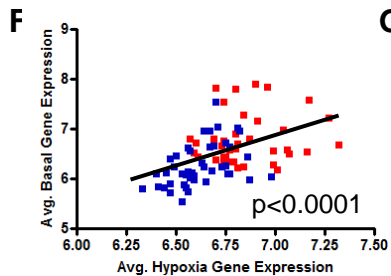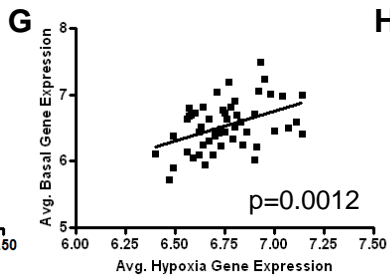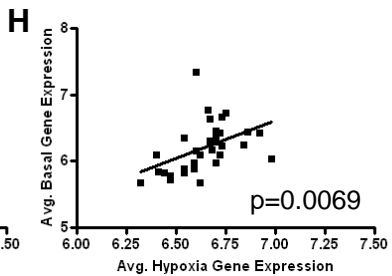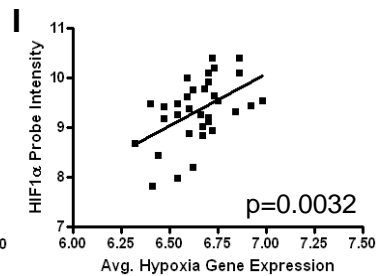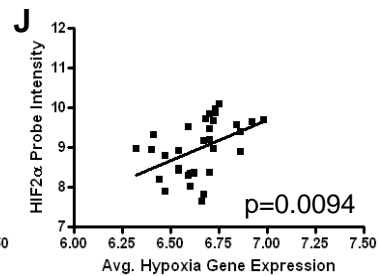

HER2+ IHC Tumors

Supplement: MOESM9 [file 9702366]
